# Supplementary material
Source: publisher figshare collection journal article supplement (https://acs.figshare.com/ndownloader/files/7725598)
Supplement: Supplementary file 1 [file 7725598]

# High-Throughput Continuous Hydrothermal Synthesis of Transparent Conducting Aluminium and Gallium Co-doped Zinc Oxides

Dougal P. Howard<sup>†</sup>, Peter Marchand<sup>†</sup>, Liam McCafferty<sup>†</sup>, Claire J. Carmalt<sup>†</sup>, Ivan P. Parkin<sup>†</sup> and Jawwad A. Darr<sup>†\*</sup>

<sup>†</sup>Department of Chemistry, University College London, London WC1H 0AJ, United Kingdom

## SUPPLEMENTARY INFORMATION

Table S1. Electrical characterization information on AGZO samples synthesized by CHFS, including nominal atomic percentages of the metal ions in the precursor solutions.

| Sample                               | Zn / at% | Al / at% | Ga / at% | Resistivity x 10 <sup>-3</sup> / $\Omega$ cm |
|--------------------------------------|----------|----------|----------|----------------------------------------------|
| A <sub>0.5</sub> G <sub>0.5</sub> ZO | 99.0     | 0.5      | 0.5      | 32.5 $\pm$ 0.3                               |
| A <sub>0.5</sub> G <sub>1.5</sub> ZO | 98.0     | 0.5      | 1.5      | 41.9 $\pm$ 0.4                               |
| A <sub>1.0</sub> G <sub>1.0</sub> ZO | 98.0     | 1.0      | 1.0      | 33.9 $\pm$ 0.5                               |
| A <sub>1.5</sub> G <sub>0.5</sub> ZO | 98.0     | 1.5      | 0.5      | 35.6 $\pm$ 0.4                               |
| A <sub>0.5</sub> G <sub>2.5</sub> ZO | 97.0     | 0.5      | 2.5      | 11.4 $\pm$ 7.0                               |
| A <sub>1.0</sub> G <sub>2.0</sub> ZO | 97.0     | 1.0      | 2.0      | 9.1 $\pm$ 3.6                                |
| A <sub>1.5</sub> G <sub>1.5</sub> ZO | 97.0     | 1.5      | 1.5      | 31.9 $\pm$ 0.6                               |
| A <sub>2.0</sub> G <sub>1.0</sub> ZO | 97.0     | 2.0      | 1.0      | 35.2 $\pm$ 0.4                               |
| A <sub>2.5</sub> G <sub>0.5</sub> ZO | 97.0     | 2.5      | 0.5      | 50.5 $\pm$ 0.4                               |
| A <sub>0.5</sub> G <sub>3.5</sub> ZO | 96.0     | 0.5      | 3.5      | 21.6 $\pm$ 0.3                               |
| A <sub>1.0</sub> G <sub>3.0</sub> ZO | 96.0     | 1.0      | 3.0      | 16.2 $\pm$ 0.2                               |
| A <sub>1.5</sub> G <sub>2.5</sub> ZO | 96.0     | 1.5      | 2.5      | 23.8 $\pm$ 0.6                               |
| A <sub>2.0</sub> G <sub>2.0</sub> ZO | 96.0     | 2.0      | 2.0      | 9.3 $\pm$ 2.3                                |
| A <sub>2.5</sub> G <sub>1.5</sub> ZO | 96.0     | 2.5      | 1.5      | 20.7 $\pm$ 8.1                               |
| A <sub>3.0</sub> G <sub>1.0</sub> ZO | 96.0     | 3.0      | 1.0      | 9.4 $\pm$ 7.7                                |
| A <sub>3.5</sub> G <sub>0.5</sub> ZO | 96.0     | 3.5      | 0.5      | 52.9 $\pm$ 0.3                               |
| A <sub>0.5</sub> G <sub>4.5</sub> ZO | 95.0     | 0.5      | 4.5      | 43.4 $\pm$ 0.4                               |
| A <sub>1.0</sub> G <sub>4.0</sub> ZO | 95.0     | 1.0      | 4.0      | 20.6 $\pm$ 0.1                               |
| A <sub>1.5</sub> G <sub>3.5</sub> ZO | 95.0     | 1.5      | 3.5      | 20.7 $\pm$ 1.1                               |
| A <sub>2.0</sub> G <sub>3.0</sub> ZO | 95.0     | 2.0      | 3.0      | 22.4 $\pm$ 3.2                               |

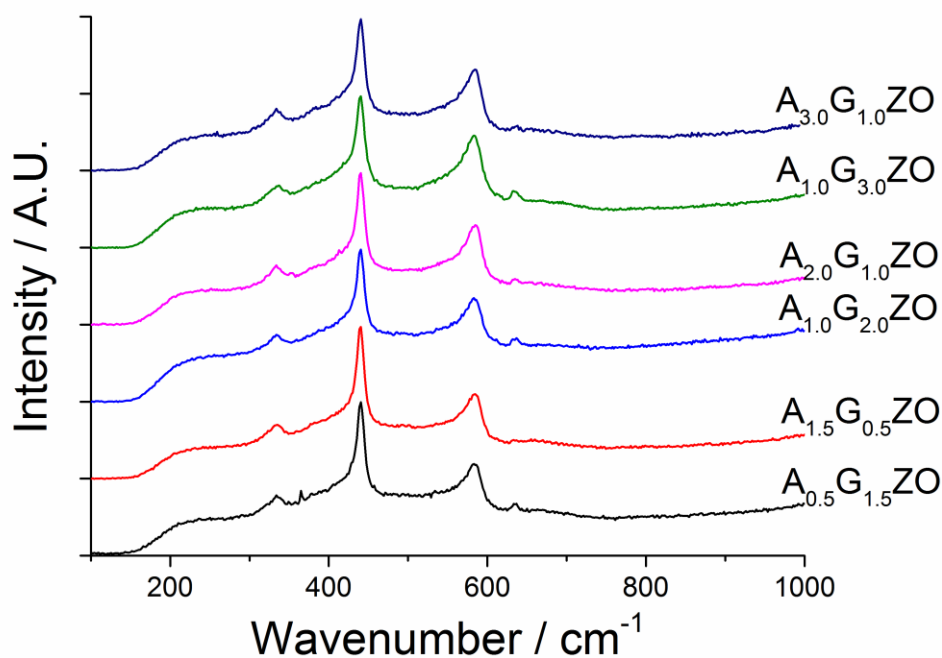

Figure S1. Raman spectra of the six representative AGZO samples. With regards to the observed dominating modes, the  $[E_2(\text{high}) - E_2(\text{low})]$  mode of ZnO appeared at  $331\text{ cm}^{-1}$ , the  $E_2$  high signal appeared at  $438\text{ cm}^{-1}$ , the  $E_1(\text{LO})$  mode appeared at  $581\text{ cm}^{-1}$ .<sup>1</sup> Additionally, a small peak appeared at  $632\text{ cm}^{-1}$ , caused by the presence of  $\text{Ga}_2\text{O}_3$  ( $A_g$  mode).<sup>2</sup> This peak was observed more strongly for those samples with more gallium in the precursor solutions.

1. High- Damen, T. C.; Porto, S. P. S.; Tell, B. Raman effect in Zinc Oxide. *Physical Reviews* 1966, 142, 570-574
2. Park, G.-S.; Choi, W.-B.; Kim, J.-M.; Choi, Y. C.; Lee, Y. H.; Lim, C.-B. Structural investigation of gallium oxide (beta-  $\text{Ga}_2\text{O}_3$ ) nanowires grown by arc-discharge. *Journal of Crystal Growth* 2000, 220, 494-500
